# Supplementary material for: A novel potent autophagy inhibitor ECDD-S27 targets vacuolar ATPase and inhibits cancer cell survival
Source: PubMed Central journal article supplement (PMC6591302; doi:10.1038/s41598-019-45641-x), 2019-06-24

## **Supplementary Information**

### **A novel potent autophagy inhibitor ECDD-S27 targets vacuolar ATPase and inhibits cancer cell survival**

Jiraporn Paha<sup>1</sup>, Phongthon Kanjanasirirat<sup>2</sup>, Bamroong Munyoo<sup>2,3</sup>, Patoomratana Tuchinda<sup>2,3</sup>, Naravut Suvannang<sup>2</sup>, Chanin Nantasenamat<sup>4</sup>, Kanokthip Boonyarattanakalin<sup>5</sup>, Prasat Kittakoop<sup>6,7,8</sup>, Sirawit Srikor<sup>1</sup>, Gunganist Kongklad<sup>9</sup>, Noppawan Rangkasenee<sup>2</sup>, Suradej Hongeng<sup>2,10</sup>, Pongsak Utaisincharoen<sup>1</sup>, Suparerk Borwornpinyo<sup>2,11</sup> & Marisa Ponpuak<sup>1,\*</sup>

## **Supplementary Methods**

### **Cell toxicity assay**

Human kidney normal cell HK-2 cells were obtained from ATCC. Cells were maintained in DMEM (Dulbecco's Modified Eagle Medium) supplemented with 10% FBS, 1% penicillin/streptomycin, and 1% HEPES at 37°C in 5% CO<sub>2</sub>. At 24 h before treatment, HK-2 cells (1 x 10<sup>4</sup> cells) were plated onto 96-well plates. Cells were then treated with DMSO (negative control) or different concentrations of ECDD-S27 for 72 h. Cell toxicity was then measured by using the MTT assay (Sigma-Aldrich) per manufacturer's recommendation. The absorbance at 570 nm was determined by Multi-Mode Microplate Reader (ENVISION, Perkin Elmer).

## Supplementary Figures

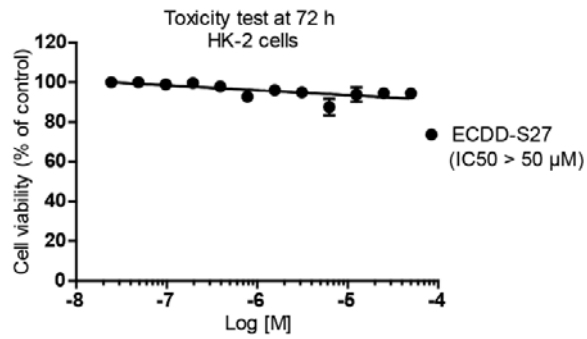

**Supplementary Fig. S1. ECDD-S27 is not toxic to human kidney normal HK-2 cells.** HK-2 cells were treated with DMSO (negative control) or varied concentrations of ECDD-S27 for 72 h and cell toxicity was measured by the MTT assay. Data are mean  $\pm$  SEM done in triplicate; the results were expressed relative to the DMSO control, defined as 100%.

Images of immunoblotting

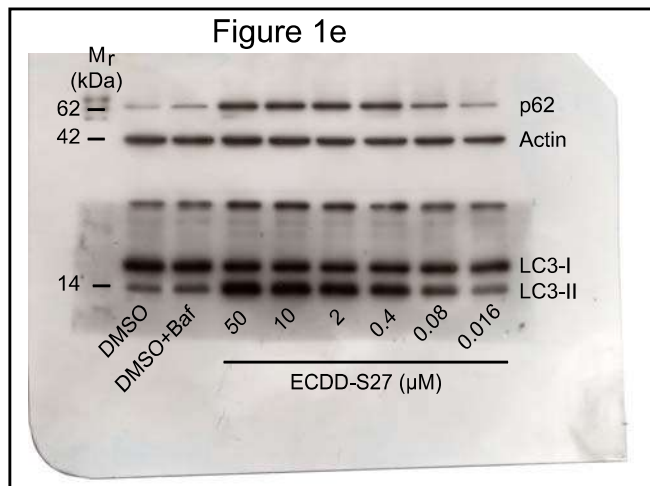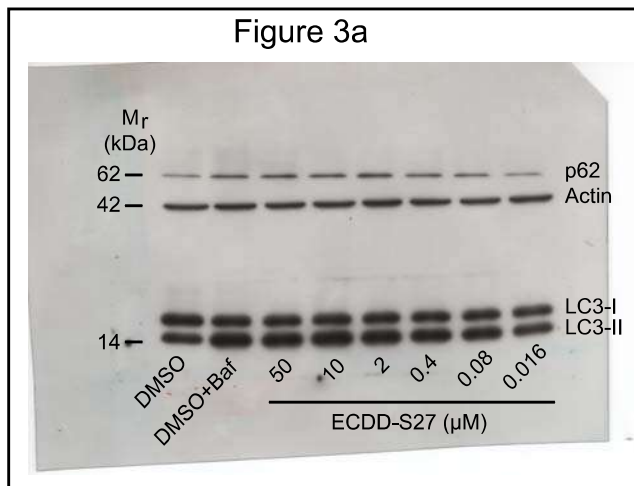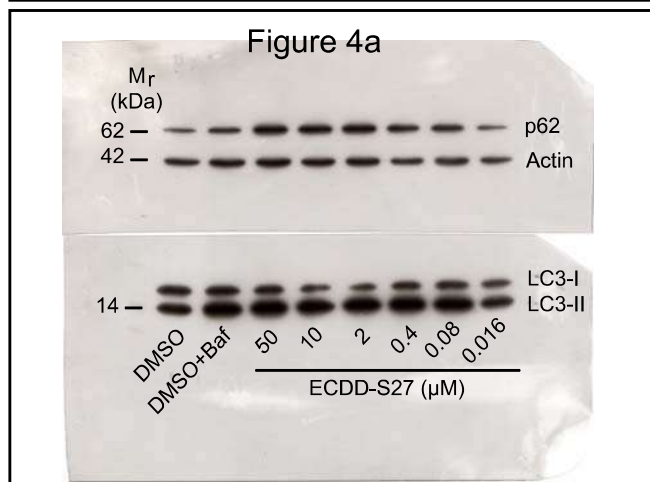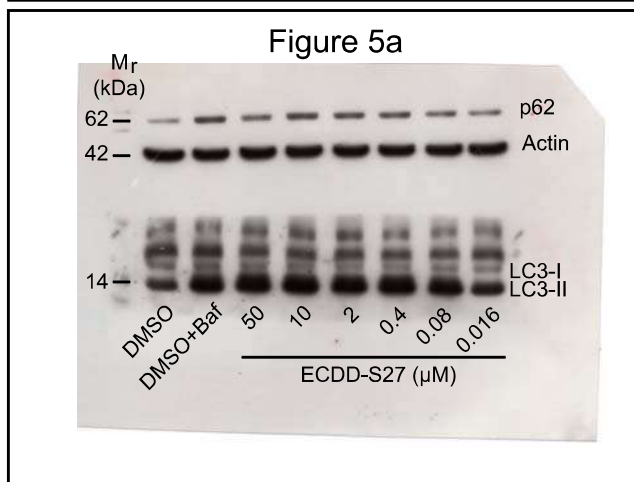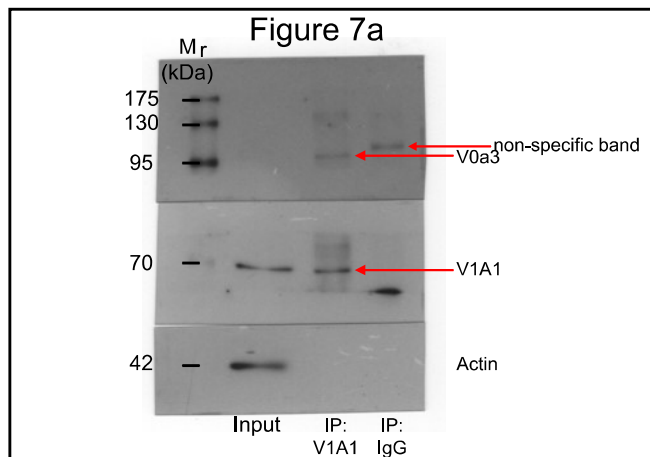

Supplement: 41598_2019_45641_MOESM1_ESM.pdf [file 41598_2019_45641_MOESM1_ESM.pdf]
